# Supplementary material for: Cost–effectiveness analysis of empagliflozin compared with glimepiride in patients with Type 2 diabetes in China
Source: Atypon-hosted journal article supplement (doi:10.2217/cer-2020-0284), 2021-02-12
Supplement: suppl_file.docx [file suppl_file.docx]

# Supplementary Materials

## Baseline characteristics

**Table S1: Baseline characteristics of the patients in the trial**

| **Variable** | | **Mean ± SE** |
| --- | --- | --- |
| **Patient Demographics** |
| Start age (years) | | 55.9 ± 10.4 |
| Duration of Diabetes (years) | | 6 |
| Proportion Male (0-1) | | 0.55 |
| **Baseline Risk Factors** | |  |
| HbA1c (%-points) | | 7.92 ± 0.84 |
| SBP (mmHg) | | 133.5 ± 15.9 |
| DBP (mmHg) | | 79.5 ± 9.4 |
| T-CHOL (mg/dl) | | 161.64 ± 55.68 |
| HDL (mg/dl) | | 43.95 ± 6.01 |
| LDL (mg/dl) | | 71.79 ± 25.6 |
| TRIG (mg/dl) | | 103.19 ± 74.32 |
| BMI (kg/m2) | | 30.11 ± 5.29 |
| Haemoglobin (gr/dl) | | 13.85 ± 1.35 |
| WBC (106/ml) | | 6.9 ± 1.45 |
| uACR (mg/mmol) | | 4.5 ± 15.17 |
| Serum Creatinine (mg/dl) | | 0.88 ± 0.12 |
| Serum albumin (g/dl) | | 4.75 ± 0.41 |
| Prop. smoker | | 0.15 |
| Cigarettes/day | | 3.00 |
| Alcohol consumption oz/week | | 3.00 |
| **Baseline CVD complications** | |  |
| Prop. MI | | 0.013 |
| Prop. Angina | | 0.005 |
| Prop. PVD | | 0.001 |
| Prop. stroke | | 0.060 |
| Prop. HF | | 0.002 |
| Prop. Atrial fibrillation | | 0.013 |
| Prop. LVH | | 0.006 |
| **BASELINE RENAL COMPLICATIONS** | |  |
| Prop. Microalbuminuria | | 0.027 |
| Prop. macroalbuminuria | | 0.006 |
| Prop. ESRD | | 0.00118 |
| **BASELINE RETINOPATHY COMPLICATIONS** | |  |
| Prop. BDR | | 0.047 |
| Prop. PDR | | 0.071 |
| Prop. SVL | | 0.030 |
| **BASELINE MACULAR EDEMA** | |  |
| Prop. ME | | 0.001 |
| **BASELINE CATARACT** | |  |
| Prop. cataract | | 0.058 |
| **BASELINE NEUROPATHY** | |  |
| Prop. neuropathy | | 0.082 |

Source: Clinical Trial Report (1)

SE: standard error; SBP: systolic blood pressure; DBP: diastolic blood pressure; T-Chol: total cholesterol; HDL: high density lipoprotein; LDL: low density lipoprotein; TRIG: triglycerides; BMI: body mass index; WBC: white blood cells; uACR: urinary albumin/creatinine ratio; MI: myocardial infarction; PVD: peripheral vascular disease; HF: heart failure; LVH: left ventricular hypertrophy; MA: microalbuminuria; GRP: Gross renal proteinuria; ESRD: end-stage renal disease; BDR: background diabetic retinopathy; PDR: proliferative diabetic retinopathy; SVL: severe vision loss; ME: macular edema

## Utility data

**Table S2 : Utility data of health state and disutility associated to events**

| Variable | Mean values | SD | Reference |
| --- | --- | --- | --- |
| U T2 no complications | 0.876 | 0.0531 | Li et al 2018 (1) |
| DisU MI event | -0.055 | 0.0066 | Beaudet et al 2014 (2) |
| U post MI | 0.821 | 0.0066 |
| U angina | 0.786 | 0.0184 |
| U heart failure | 0.768 | 0.0301 |
| DisU stroke event | -0.164 | 0.0301 |
| U post Stroke | 0.712 | 0.0301 |
| U PVD | 0.815 | 0.0219 |
| U microalbuminuria | 0.876 | 0.0531 |
| U macroalbuminuria | 0.828 | 0.0219 |
| U HD | 0.712 | 0.0561 |
| U PD | 0.672 | 0.1378 |
| U RT | 0.762 | 0.0531 |
| U BDR | 0.836 | 0.0617 |
| U BDR wrongly treated | 0.836 | 0.0617 |
| U PDR laser treated | 0.806 | 0.0148 |
| U PDR no Laser | 0.806 | 0.0148 |
| U ME | 0.836 | 0.0133 |
| U SVL | 0.802 | 0.025 |
| U cataract | 0.86 | 0.0077 |
| U neuropathy | 0.792 | 0.0138 |
| U healed ulcer | 0.876 | 0.0531 |
| QoL active ulcer | -0.17 | 0.0189 |
| U active ulcer | 0.706 | 0.561 |
| U post amputation | 0.596 | 0.0561 |
| Diminishing NSHE disutility | Yes |  | Lauridsen et al 2014 (3) |
| DisU for SHE 1 (during daytime) | -0.0205 | - | Foos et al 2018 (4) |
| DisU for SHE 1 (nocturnal) | -0.0205 | - | Foos et al 2018 (4) |
| DisU for SHE 2 (during daytime) | -0.0743 | - | Foos et al 2018 (4) |
| DisU for SHE 2 (nocturnal) | -0.0743 | - | Foos et al 2018 (4) |
| DisU for UTI/GI | -0.00476 | - | Calculated based on Turner et al 2014 and NICE clinical guideline No. 139 (5, 6) |

DisU: disutility of an event; U: health state utility;Amp – Amputation; BDR -Background Retinopathy; PDR- Proliferative Diabetic Retinopathy; CHF - Congestive heart failure; GUI- Genital and urinary infection; HF-Heart failure; HD – Hemodialisis; PD- Peritoneal dialysis; MA – Microalbuminuria; ME - Macular Edema; MI - Myocardial infarction; NSHE- Non-Severe Hypoglycemia; PDR - Proliferative diabetic retinopathy; PVD - Peripheral vascular disease; RT - Renal transplant; PD - Peritoneal dialysis; SVL - Severe vision loss; SHE- Severe hypoglycemia

## Cost data

Table S3: Management costs, Diabetes related complication costs and adverse event costs

| Variable | Value  (2020 CNY) | Reference |
| --- | --- | --- |
|  |  |  |
| **Management Costs** |  |  |
| Annual statins treatment (annual | 1068.93 | Chinese simvastatin daily costs ×365 |
| Annual Aspirin | 219.00 | Chinese aspirin daily costs ×365 |
| Annual ACE inhibitor | 47.45 | Chinese ramipril daily costs ×365 |
| Annual screening microalbuminuria | 40.00 | Local KOL survey |
| Annual screening macroalbuminuria | 15.00 | Local KOL survey |
| Annual eye screening | 60.00 | Local KOL survey |
|  |  |  |
| **Direct Costs CVD Complications** |  |  |
| Myocardial infarction 1st year | 32,517 | Foos et al 2018 (8) |
| Myocardial infarction 2nd+ years | 10,839 | Foos et al 2018 (8) |
| Angina 1st year | 41,245 | Foos et al 2018 (8) |
| Angina 2nd+ years | 7,363 | Foos et al 2018 (8) |
| Congestive heart failure 1st year | 9,756 | Foos et al 2018 (8) |
| Congestive heart failure 2nd+ years | 6,503 | Foos et al 2018 (8) |
| Stroke 1st year | 19,165 | Foos et al 2018 (8) |
| Stroke 2nd+ years | 8,630 | Foos et al 2018 (8) |
| Stroke death within 30 days | 14,852 | Foos et al 2018 (8) |
| Peripheral vascular disease 1st year | 25,390 | Foos et al 2018 (8) |
| Peripheral vascular disease 2nd+ years | 9,869 | Foos et al 2018 (8) |
|  |  |  |
| **Direct Costs Renal Complications** |  |  |
| Haemodialysis 1st year | 85,285 | Foos et al 2018 (8) |
| Haemodialysis 2+ years | 72,001 | Foos et al 2018 (8) |
| Peritoneal dialysis 1st year | 59,168 | Foos et al 2018 (8) |
| Peritoneal dialysis 2+ years | 48,259 | Foos et al 2018 (8) |
| Renal transplant costs 1st year | 256,204 | Foos et al 2018 (8) |
| Renal transplant 2+ years | 67,755 | Foos et al 2018 (8) |
|  |  |  |
| **Direct Costs Acute Events** |  |  |
| Non-severe hypoglycaemic event | 182 | Foos et al 2018 (8) |
| Severe hypoglycemic event 1 (requiring non-medical assistance) | 182 | Foos et al 2018 (8) |
| Severe hypoglycemic event 2 (requiring medical assistance) | 3,869 | Foos et al 2018 (8) |
| Urinary Tract Infection + Genital Infection | 9 | Chinese Procurement Website (9) |
|  |  |  |
| **Direct Costs Eye Disease** |  |  |
| Laser treatment | 2,391 | Foos et al 2018 (8) |
| Cataract operation | 7,529 | Foos et al 2018 (8) |
| Following cataract operation | 197 | Foos et al 2018 (8) |
| Blindness - year of onset | 5,638 | Foos et al 2018 (8) |
| Blindness - following years | 1,528 | Foos et al 2018 (8) |
|  |  |  |
| **Direct Costs Neuropathy/Foot Ulcer/Amputation** |  |  |
| Neuropathy, 1st year | 5,346 | Foos et al 2018 (8) |
| Neuropathy, 2nd+ years | 6,479 | Foos et al 2018 (8) |
| Amputation (lower extremity) | 7,128 | Foos et al 2018 (8) |
| Amputation Prosthesis | 21,460 | Foos et al 2018 (8) |
| Gangrene treatment | 4,753 | Foos et al 2018 (8) |
| After healed ulcer | 896 | Local KOL survey |
| Infected ulcer | 5,346 | Foos et al 2018 (8) |
| Standard uninfected ulcer | 3,262 | Foos et al 2018 (8) |
| Healed ulcer history of amputation | 896 | Local KOL survey |

**References**

1. Clinicaltrials.gov. Efficacy and Safety of Empagliflozin (BI 10773) With Metformin in Patients With Type 2 Diabetes 2016 [Available from: https://clinicaltrials.gov/ct2/show/NCT01167881.

2. Li T, Wan X, Ma J, Wu B. Cost-Effectiveness of Primary Prevention with Statin Treatment for Chinese Patients with Type 2 Diabetes. *Adv Ther*. 35(12),2214-2223 (2018).

3. Beaudet A, Clegg J, Thuresson PO, Lloyd A, McEwan P. Review of utility values for economic modeling in type 2 diabetes. *Value Health*. 17(4),462-70 (2014).

4. Lauridsen JT, Lonborg J, Gundgaard J, Jensen HH. Diminishing marginal disutility of hypoglycaemic events: results from a time trade-off survey in five countries. *Qual Life Res*. 23(9),2645-2650 (2014).

5. Foos V, McEwan P. Conversion of Hypoglycemia Utility Decrements from Categorical Units Reflecting Event History into Event Specific Disutility Scores Applicable to Diabetes Decision Models. *Value in Health*. 21 (2018).

6. Turner KM, Round J, Horner P, Macleod J, Goldenberg S, Deol A, et al. An early evaluation of clinical and economic costs and benefits of implementing point of care NAAT tests for Chlamydia trachomatis and Neisseria gonorrhoea in genitourinary medicine clinics in England. *Sex Transm Infect*. 90(2),104-111 (2014).

7. Royal College of Physicians (UK). Appendix KSystematic review of health related quality of life for symptomatic UTI. 2012.

8. Foos V, Wang K, McEwan P, Zhang Y, Xin P, Jiang X, et al. Assessing the Burden of Type 2 Diabetes in China Considering the Current Status-Quo Management and Implications of Improved Management Using a Modeling Approach. *Value Health Reg Issues.* 18,36-46 (2018).

9. Drug Price Network. 2018 [Available from: https://www.315jiage.cn]
